2      **Adintoviruses: An Animal-Tropic Family of Midsize Eukaryotic Linear dsDNA**  
3                                      **(MELD) Viruses**

4

5           Gabriel J. Starrett<sup>†</sup>, Michael J. Tisza<sup>†</sup>, Nicole L. Welch, Anna K. Belford, Alberto Peretti,

6                                   Diana V. Pastrana, and Christopher B. Buck\*

7

8    Lab of Cellular Oncology, NCI, NIH, Bethesda, MD, 20892 USA

9

10   <sup>†</sup>These authors contributed equally

11

12   \*Corresponding author: [buckc@mail.nih.gov](mailto:buckc@mail.nih.gov)

13

14

15

16

## Abstract

17 Polintons (also known as Mavericks) were initially identified as a widespread class of eukaryotic  
18 transposons named for their hallmark type B DNA *polymerase* and retrovirus-like *integrase*  
19 genes. It has since been recognized that many polintons encode possible capsid proteins and viral  
20 genome-packaging ATPases similar to those of a diverse range of double-stranded DNA  
21 (dsDNA) viruses. This supports the inference that at least some polintons are viruses that remain  
22 capable of cell-to-cell spread. At present, there are no polinton-associated capsid protein genes  
23 annotated in public sequence databases. To rectify this deficiency, we used a data-mining  
24 approach to investigate the distribution and gene content of polinton-like elements and related  
25 DNA viruses in animal genomic and metagenomic sequence datasets. The results define a  
26 discrete family-like clade of animal-specific viruses with two genus-level divisions. We suggest  
27 the family name *Adintoviridae*, connoting similarities to *adenovirus* virion proteins and the  
28 presence of a retrovirus-like *integrase* gene. Although adintovirus-class PolB sequences were  
29 detected in datasets for fungi and various unicellular eukaryotes, sequences resembling  
30 adintovirus virion proteins and accessory genes appear to be restricted to animals. Degraded  
31 adintovirus sequences are endogenized into the germlines of a wide range of animals, including  
32 humans.

33

34

35

36

## Introduction

37 Analyses based on conserved protein structural features have increasingly revealed  
38 commonalities between families of eukaryotic viruses with double-stranded DNA (dsDNA)  
39 genomes. A current model places a loosely defined group known as polinton-like viruses at the  
40 center of a network of evolutionary relationships (Koonin, Dolja et al. 2015, Koonin, Krupovic et  
41 al. 2015). Polintons (also known as Mavericks) are defined by the presence of a type B DNA  
42 polymerase (PolB) and a retrovirus-like *integrase* gene. Although polintons were first recognized  
43 as transposons, the observation that many of them encode predicted virion proteins supports the  
44 proposal that most elements initially designated as polinton transposons are actually integrated  
45 proviruses that may remain capable of infectious cell-to-cell spread (Krupovic, Bamford et al.  
46 2014, Krupovic and Koonin 2015).

47

48 Adenoviruses, poxviruses, and baculoviruses are familiar groups of animal-tropic viruses that  
49 encode genes distantly similar to polinton PolB and virion proteins (Koonin, Dolja et al. 2015).  
50 An emerging group of viruses known as virophages, which are named for their ability to  
51 parasitize megaviruses that infect unicellular eukaryotes, also encode polinton-like PolB and  
52 virion protein genes as well as, in some cases, retrovirus-like integrase genes. (Duponchel and  
53 Fischer 2019).

54

55 Although polintons have been widely recognized in animal genomics and transcriptomics  
56 datasets (Krupovic, Bamford et al. 2014), the proposed capsid genes of these elements are not  
57 currently annotated in public sequence databases. This has led to confusion. For instance, a  
58 recent study detected two “Maverick transposons” in insect cell cultures but failed to annotate  
59 the capsid genes that identify them as likely viruses (Geisler 2018). In another example, a set of  
60 classic polinton PolB gene fragments detected in mouse fecal samples appear in GenBank with  
61 annotations incorrectly indicating that they are parvovirus structural proteins (Williams, Che et  
62 al. 2018). A primary goal of this study is to develop a coherent classification system for animal-  
63 tropic viruses with polinton-like genes and to facilitate further discovery by rendering annotated  
64 examples of these viruses searchable in public databases.

65

## 66 Results

### 67 Classification of animal-associated contigs with polinton-like PolB genes

68

69 TBLASTN searches using the inferred virion maturational protease (Adenain) of an arbitrarily  
70 chosen *Parasteatoda* spider contig (AOMJ02256338) identified hundreds of >10kb contigs of  
71 interest in NCBI’s whole genome shotgun (WGS) and transcriptome shotgun assembly (TSA)  
72 databases, as well as in *de novo* assemblies of various datasets of interest from the Sequence  
73 Read Archive (SRA). In animal datasets, a great majority of the larger adenain-bearing elements  
74 were found to encode either an archetypal polinton-like PolB (pfam03175) or a divergent PolB  
75 <30% identical to the pfam03175 type. Both PolB types encode a distinctive N-terminal domain  
76 with predicted structural similarity to the ovarian tumor superfamily of ubiquitin-specific  
77 proteases (OTU). Adenovirus PolB sequences lack the OTU domain. In this study, we refer to

78 the OTU-pfam03175 PolB class as Alpha and the second OTU-PolB class as Beta. In RepBase  
79 <https://www.girinst.org/>, polinton groups 1, 2, 3, 4, and 9 each contain both Alpha and Beta PolB  
80 genes. Alpha PolB genes have previously been binned with hybrid virophages, ungrouped  
81 polinton-like viruses, and Polintons group 2, while Beta PolB genes have been binned with  
82 ungrouped polinton-like viruses, plant and fungal mitochondrial plasmids, and Polintons group 1  
83 (Moriyama, Terasawa et al. 2008, Yutin, Raoult et al. 2013, Yutin, Kapitonov et al. 2015, Yutin,  
84 Shevchenko et al. 2015).

85

86 In BLASTP searches, Alpha PolB sequences give strong hits (E-values  $\sim 1e-60$ ) for an emerging  
87 group of bipartite parvovirus-like viruses called bidnaviruses or bidensovirus (Krupovic and  
88 Koonin 2014). Use of the DELTA-BLAST algorithm (Boratyn, Schaffer et al. 2012) yields  
89 stronger hits (E-values  $< 1e-100$ ) for adenoviruses. Beta PolB sequences typically do not yield  
90 bidnavirus hits in BLASTP searches and instead give moderate hits (E-value  $\sim 1e-15$ ) for the  
91 PolB proteins of megaviruses (e.g., Faustovirus and Klosneuvirus) as well as various  
92 bacteriophages (Figure 1). Neither of the two PolB classes detects known virophage PolB  
93 sequences in BLASTP or DELTA-BLAST searches.

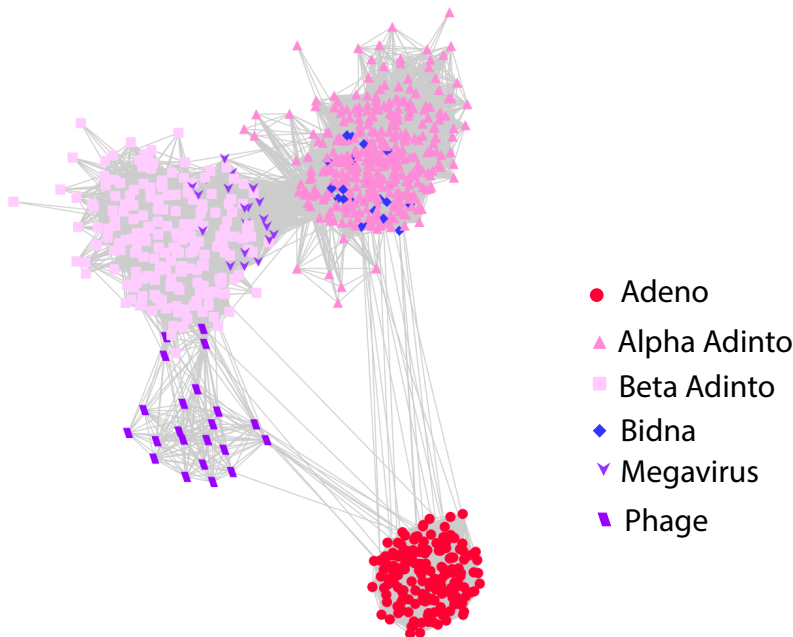

94

95

96 **Figure 1: PolB BLASTP relationships.** PolB protein sequences were subjected to all-  
97 against-all sequence similarity network analysis with a BLASTP E-value cutoff of  $1e-06$ .

98 Figure supplement 1: an interactive version of Figure 1 that can be viewed using

99 Cytoscape software <https://cytoscape.org>

100 Figure supplement 2: sequence compilations for PolB and other proteins (fasta format, zip  
101 compressed)

102 Figure supplement 3: network analysis of Hexon and Penton proteins

103

104 In addition to Adenain and PolB, nearly all  $>10$  kb contigs from the WGS and TSA surveys  
105 encode a retrovirus-like integrase (protein family rve) as well as a protein similar to a group of

106 FtsK/HerA-type nucleoside triphosphatases (FtsK) that are thought to mediate the packaging of  
107 viral genomes into virions (Iyer, Makarova et al. 2004).

108  
109 Alignments of selected contigs back to parent read datasets showed that coverage depth fell to  
110 zero near the ends of some contigs. An example is shown graphically in Figure 2 Figure  
111 supplement 2. In some cases, such as a *Mayetiola destructor* (barley midge) read dataset, a single  
112 predominant apparently free-ended sequence could be assembled but the dataset also contained a  
113 range of lower-coverage variant reads near the termini, some of which extended into inverted  
114 terminal repeats (ITRs) and host genomic DNA sequences. The observation suggests that the  
115 integrase gene is functional and mediates integration events akin to those observed in virophages  
116 that encode rve integrases (Fischer and Hackl 2016).

117  
118 Based on the similarities to adenoviruses and the presence of *integrase* and *virus* genome-  
119 packaging genes we suggest that this group of animal-associated elements could be referred to as  
120 “adintoviruses.” Maps of reference adintoviruses are shown in Figure 2.

121

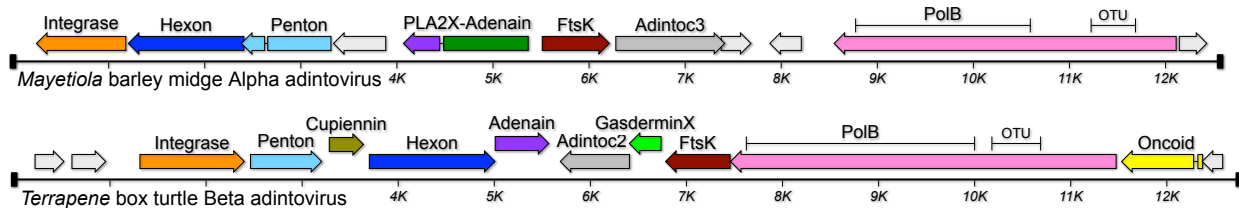

122

123 **Figure 2: Genome maps of two representative adintoviruses.**

124 Figure supplement 1: accession numbers and full Linnaean designations of animal hosts (MS  
125 Excel table).

126 Figure supplement 2: graphical examples of the gene-annotation process.

127 Figure supplement 3: graphical maps of additional adintoviruses.

128 Figure supplement 4: annotated nucleotide maps of adintoviruses and related viruses  
129 (GenBank-formatted text file).

130

131 HHpred searches confirmed the presence of ORFs with high-probability predicted structural  
132 similarity to the double-jellyroll major capsid proteins (Hexons) and single-jellyroll vertex minor  
133 capsid proteins (Pentons) of adenoviruses, virophages, megaviruses, or poxviruses (see Figure 2  
134 Figure supplement 2 for illustrated examples of annotation methods). As expected, contigs with  
135 Beta PolB genes encode Hexon and Penton proteins that occupy discrete clusters that encompass  
136 the *Terrapene* Beta adintovirus cognates (Figure 1 Figure supplement 3). Although most contigs  
137 with Alpha PolB genes encode Hexon and Penton proteins that cluster with the *Mayetiola*  
138 cognates, some Alpha PolB contigs unexpectedly encode virion proteins that are interspersed  
139 within the *Terrapene* cluster. Similar results were observed in analyses using traditional  
140 phylogenetic trees. The results suggest the existence of distinct Alpha and Beta adintovirus  
141 lineages, but with some examples reflecting horizontal transfer of virion protein operons from  
142 the Beta PolB lineage into the Alpha PolB lineage. We have previously proposed a similar intra-  
143 family horizontal gene transfer scenario for some species of polyomaviruses (Buck, Van  
144 Doorslaer et al. 2016).

145

146

## 147 **Other adintovirus genes**

148 Adintoviruses encode three classes of proteins with predicted structures resembling known  
149 membrane-active proteins. A previously noted class (Yutin, Raoult et al. 2013) is similar to the  
150 phospholipase A2 (PLA2) domain of parvovirus VP1 virion proteins (Figure 2 Figure  
151 supplement 2). In parvoviruses, the domain is thought to be involved in membrane disruption  
152 during the infectious entry process. The PLA2-like genes, which are characteristic of *Mayetiola*-  
153 class (Alpha) virion protein operons, include a C-terminal domain similar to adenovirus virion  
154 core protein ten (pX). We suggest the gene name PLA2X.

155

156 Beta adintoviruses, as well as Alpha PolB adintoviruses with *Terrapene*-class (Beta) virion  
157 protein operons, encode homologs of the C-terminal regulatory domain of gasdermins, a group  
158 of pore-forming proteins that serve as executioners in pyroptosis (a form of inflammatory  
159 programmed cell death)(Dubois, Sorgeloos et al. 2019). Like PLA2X, adintovirus gasdermin  
160 homologs typically encode a pX-like domain near the C-terminus. Apparent homologs of a  
161 membrane-active spider venom protein known as cupiennin were also observed in Beta-class  
162 virion protein operons. The pairing of hallmark Beta-class virion accessory genes (GasderminX,  
163 Cupiennin) with a subset of Alpha PolB adintoviruses (Figure 2 Figure supplement 3) supports  
164 the hypothesis that some adintovirus species arose through chimerization between the Alpha and  
165 Beta adintovirus lineages.

166

167 Some classes of predicted protein sequences were conserved among adintoviruses but did not  
168 show clear hits for known proteins in BLASTP or HHpred searches. We assigned these groups of  
169 adintovirus-conserved proteins of unknown function numbered “Adintoc” names.

170

171 Small DNA tumor viruses (adenoviruses, polyomaviruses, and papillomaviruses (Pipas 2019))  
172 encode proteins harboring conserved LXCXE motifs that that are known to engage cellular  
173 retinoblastoma (Rb) and related tumor suppressor proteins (de Souza, Iyer et al. 2010).

174 Adenovirus E1A, papillomavirus E7, polyomavirus LT, and parvovirus NS3 oncoproteins  
175 typically encode the Rb-binding motif just upstream of a consensus casein kinase 2 acceptor  
176 motif ((ST)XX(DE)). Some oncogenes, such as E1A, encode an additional conserved region  
177 ((DEN)(LIMV)XX(LM)(FY)), referred to as CR1, that binds the groove containing the A and B  
178 cyclin folds within the Rb pocket domain (Pipas 1992, Gouw, Michael et al. 2018). In general,  
179 these predicted Rb-interacting motifs are adjacent to potential zinc- or iron-sulfur-binding motifs  
180 (typically, paired CXXC). Open reading frames encoding combinations of these short linear  
181 motifs were observed in adintovirus contigs. We refer to these predicted proteins, which  
182 typically occupy a region upstream of the PolB gene, as “Oncoid” genes, conjnoting their  
183 similarities to the known oncogenes of small DNA tumor viruses. Adintovirus homologs of anti-  
184 apoptotic proteins, such as Bcl2 and IAP, were also observed (Figure 2 Figure supplement 3).

185

186

## 187 **Distribution of adintovirus-like PolB sequences in eukaryotic WGS datasets**

188 The conserved catalytic core PolB sequences of either the *Mayetiola* barley midge Alpha  
189 adintovirus or *Terrapene* box turtle Beta adintovirus were used separately as baits in TBLASTN  
190 searches of WGS databases for eukaryotes. Retrieved protein sequences were trimmed to 80%  
191 similarity and subjected to clustering with an alignment score threshold of 60 (Shannon, Markiel

192 et al. 2003, Li and Godzik 2006, Huang, Niu et al. 2010, Fu, Niu et al. 2012, Zallot, Oberg et al.  
193 2018). The clustering segregated away Beta adintovirus-like PolB sequences encoded by plant  
194 and fungal mitochondria (e.g., EU365401, AF061244). The filtered sequences were subjected to  
195 phylogenetic analyses (Figure 3).  
196

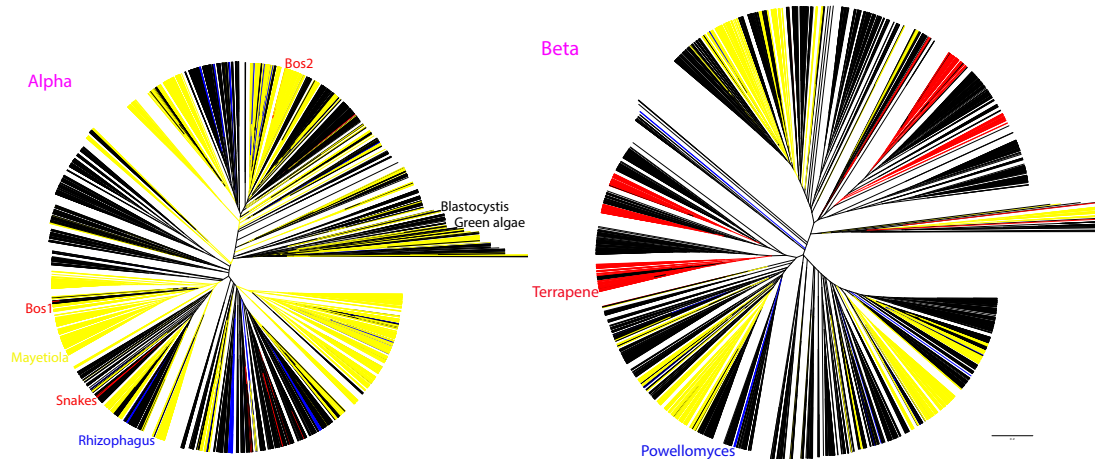

197  
198  
199 Figure 3: Phylogenetic trees comprised of WGS hits for Alpha or Beta adintovirus PolB  
200 sequences (left and right panels, respectively). Hits from insect datasets are colored  
201 yellow, hits from tetrapod datasets are red and fungus-associated hits are blue. All other  
202 types of eukaryotes are represented by black lines. Annotated branches show two Alpha  
203 adintovirus sequences associated with bovine (*Bos*) lung samples clustering with  
204 adintovirus sequences from insect datasets, suggesting an environmental insect source. In  
205 contrast, exemplar *Mayetiola* and *Terrapene* adintoviruses cluster with sequences found  
206 in other insect or terrestrial vertebrate datasets, respectively. Similarly, adintovirus PolB-  
207 like sequences from *Powellomyces* and *Rhizophagus* fungi cluster with sequences from  
208 other types of fungi.

209 Figure supplements 1 and 2: interactive Nexus-format tree files that can be viewed using  
210 FigTree software <http://tree.bio.ed.ac.uk/software/figtree/>  
211

212  
213 Two complete Alpha adintovirus-like contigs (NKLS02000104, NKLS02001728) were observed  
214 in assemblies of a PacBio-based WGS survey of bovine lung tissue. Sequences outside the  
215 inferred proviral inverted terminal repeats (ITRs) in the two sequences were highly diverse and  
216 mostly unidentifiable, but in a few reads the extra-proviral host sequences showed BLASTN  
217 similarity to genomic DNA sequences of various beetles, including *Tribolium castaneum* (a flour  
218 beetle that commonly infests cattle feed). Furthermore, the *Bos* lung-associated PolB sequences  
219 occupy phylogenetic clades comprised of insect-associated PolB sequences (Figure 3). These  
220 observations suggest that the two Alpha adintovirus sequences in the bovine datasets are insect-  
221 derived environmental contaminants, rather than mammal-tropic viruses. Similarly, several Beta  
222 adintovirus-like contigs (e.g., AANG04004209) found in a housecat oral swab sample show  
223 close phylogenetic affinity for adintovirus sequences observed in salmon WGS datasets. In  
224 another example, integrated adintoviruses found in a genomic dataset for olive trees (*Olea*  
225 *europaea*) showed insect-like sequences outside the inferred ITRs and showed phylogenetic

226 affinity with PolB sequences from insect WGS datasets. Other adintovirus-like sequences found  
227 in plant datasets resembled adintovirus PolB sequences associated with nematode datasets. It  
228 thus appears that adintovirus sequences in some datasets are derived from environmental  
229 sources, as opposed to a productive infection of the organism that was the target of the  
230 sequencing effort.

231  
232 Although there are examples of apparent environmental contamination, most adintovirus  
233 sequences form discrete clades that recapitulate the phylogeny of the host organisms that were  
234 the subjects of the WGS surveys. For example, a distinct clade of Alpha adintovirus PolB  
235 sequences was observed in datasets for multiple related species of venomous snakes. Several  
236 distinct clades of Beta adintoviruses were observed in datasets for amphibians and reptiles,  
237 including the well-populated clade that houses the exemplar *Terrapene* adintovirus. The  
238 exemplar *Mayetiola* adintovirus likewise occupies a clade exclusively populated by sequences  
239 found in insect WGS datasets.

240  
241 TBLASTN searches against *Terrapene* box turtle Beta adintovirus PolB and Hexon protein  
242 sequences both yielded weak hits (E-value  $\sim 1e-05$ ) for a locus on human chromosome 7. An  
243 adintovirus GasderminX sequence was also detected at the locus. Alignments to *Terrapene*  
244 adintovirus protein sequences were used to assign pseudogene annotations (Figure 4). The  
245 detected element is a highly disrupted endogenized Beta adintovirus. Homologous nucleotide  
246 sequences were detected in the genomes of primates, rodents, shrews, afrotherians, and  
247 xenarthrans but not in datasets for ungulates, carnivores, bats, marsupials, or prototherians.  
248 Endogenized adintovirus sequences observed in amphibian and reptile genomes do not share  
249 recognizable nucleotide similarity with placental mammal-endogenized adintovirus sequences. It  
250 is unclear whether a single adintovirus endogenization event affected an early placental mammal  
251 and the endogenized virus was then lost in non-shrew Laurasiatherians or whether multiple  
252 distinct endogenization events occurred in separate placental mammal lineages. Identification of  
253 extant examples of placental mammal adintoviruses could help resolve this question.

254

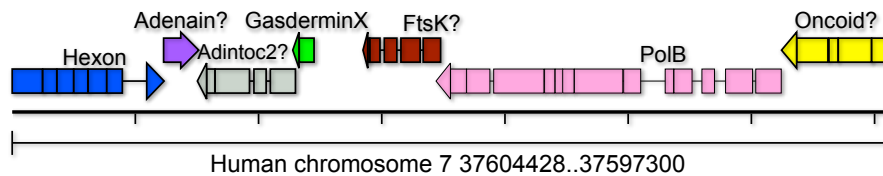

255  
256 Figure 4: An endogenized Beta adintovirus relic found on human chromosome 7. Degraded  
257 pseudogenes interrupted by nonsense and frameshift mutations were reconstructed based on  
258 alignments to the protein sequences of *Terrapene* box turtle adintovirus. Question marks  
259 indicate that the reconstructed gene does not yield hits in BLAST searches of GenBank's  
260 viruses taxon. Tentative gene assignments are based on synteny with the *Terrapene*  
261 adintovirus. The reconstructed Hexon, GasderminX, and PolB protein sequences yield  
262 DELTA-BLAST hits with E-values of  $1e-21$ ,  $4e-05$ , and  $3e-25$ , respectively.

263 Figure supplement 1: annotated GenBank-format nucleotide map of the human chromosome  
264 7 endogenized adintovirus depicted graphically in Figure 4.

265

266 **Viruses with adinto-like genes in non-animal eukaryote datasets**

267



268 Eukaryotic viruses with midsize (10-50 kb) linear dsDNA genomes show a remarkable degree of  
 269 genomic modularity (Koonin, Dolja et al. 2015, Yutin, Kapitonov et al. 2015, Yutin, Shevchenko  
 270 et al. 2015). The apparently promiscuous horizontal gene transfer and lack of any single defining  
 271 gene for these viruses makes the group taxonomically challenging. We propose the collective  
 272 acronym MELD (midsize eukaryotic linear dsDNA) virus for the dizzyingly polyphyletic  
 273 category. The name, which would encompass adenoviruses and adintoviruses, is intended to fill a  
 274 gap between other operationally defined umbrella groups, such as CRESS viruses, small DNA  
 275 tumor viruses, nucleocytoplasmic large DNA viruses, and megaviruses.

276

277 Datasets for *Blastocystis hominis* (a diatom-related unicellular eukaryote that commonly inhabits  
 278 the human gut) contain MELD virus sequences that unite Alpha adintovirus-like PolB and  
 279 integrase genes with inferred virion proteins whose primary sequences are not recognizably  
 280 similar to known virion proteins (Figure 5). Gene identities for the *Blastocystis* virus were  
 281 inferred based on HHpred results. Comparable MELD viruses were confirmed in rumen  
 282 metagenomic datasets for sheep (Yutin, Kapitonov et al. 2015) and cattle, as well as in WGS  
 283 datasets for green algae and fungi. In phylogenetic analyses, the PolB sequences of these viruses  
 284 occupy long branches that are distant from animal-associated PolB clades (Figure 3).

285

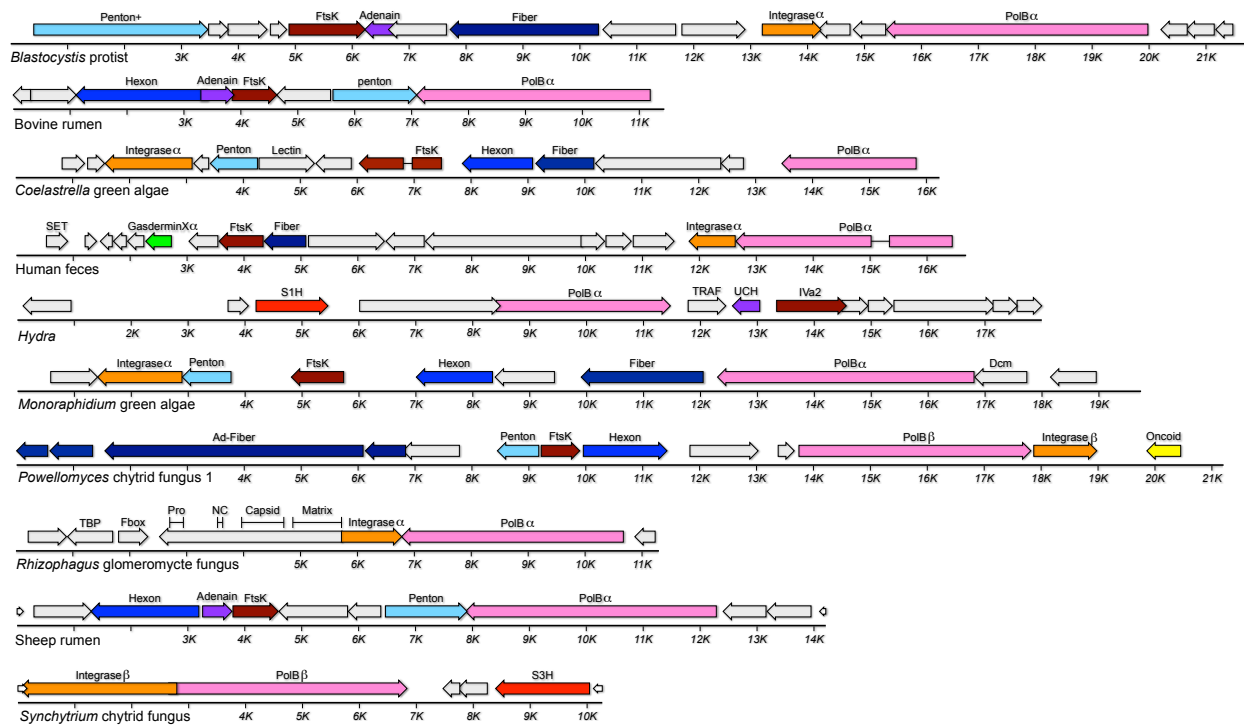

286

287

288 Figure 5: MELD viruses (and related elements) with adintovirus-like PolB genes. Greek  
 289 letters indicate genes similar to adintoviruses in BLASTP or DELTA-BLAST searches.

290 “Ad-” indicates similarity to adenovirus sequences. Abbreviations: Fiber, predicted  
 291 structural or primary sequence similarity to bacteriophage tail fibers or coiled-coil  
 292 proteins; Lectin, predicted structural similarity to galactose-binding domains; Dcm,  
 293 predicted structural similarity to cytosine DNA methyltransferases; TBP, similar to

294 TATA binding proteins; Matrix/Capsid/NC/Pro, similarities to retroviral Gag and  
295 retropepsin; S3H, poxvirus D5-like superfamily 3 helicase.

296  
297

298 Contigs encoding Alpha adintovirus-like PolB and integrase genes were found in metagenomics  
299 datasets for bioreactor-cultured human feces, human urine samples, and human oral swab  
300 samples (Santiago-Rodriguez, Ly et al. 2015). This group of closely related sequences was only  
301 detected in datasets from a single laboratory and not in other human metagenomics surveys.  
302 Divergent variants of predicted proteins from the feces-associated virus were found in contigs  
303 from datasets for *Cyanophora paradoxa*, a species of glaucophyte algae (e.g., QPMI01000557),  
304 suggesting that the human feces-associated adintovirus-like sequences were derived from an  
305 environmental source.

306

307 Six MELD virus genomes assembled from a single *Powellomyces* SRA dataset unite sequences  
308 resembling adenovirus vertex fiber proteins with either a Beta adintovirus-like PolB (Figure 5) or  
309 a surprising variety of non-PolB DNA replicases (Figure 6). MELD virus genomes encoding  
310 genes similar to Alpha adintovirus virion proteins (E-values  $\sim 1e^{-7}$  to  $1e^{-21}$ ) were assembled  
311 from datasets for *Capsaspora owczarzaki*, *Monosiga brevicollis*, and *Trichoplax H2* (unicellular  
312 eukaryotes that are thought to be closely related to animals). Aside from the abovementioned  
313 insect- and nematode-associated adintovirus sequences found in datasets for plants, adintovirus-  
314 like virion protein sequences were not detected in datasets for other non-animal eukaryotes.  
315 *Capsaspora* MELD virus 1 and the *Trichoplax* MELD virus both encode superfamily 1 helicase  
316 (S1H) genes instead of a PolB gene. Various megaviruses and bacteriophages encode similar  
317 S1H genes, as does a MELD virus observed in *Physarum polycephalum* slime mold and in  
318 *Powellomyces* MELD virus 4. Full-length S1H replicase genes of this class were not detected in  
319 animal WGS datasets, with the exception of seemingly endogenized degraded virus-like contigs  
320 in datasets for several coral and jellyfish species and a helitron-like element found in  
321 *Branchiostoma* lancelets (e.g., RDEB01009762, ABEP02037959).

322

323

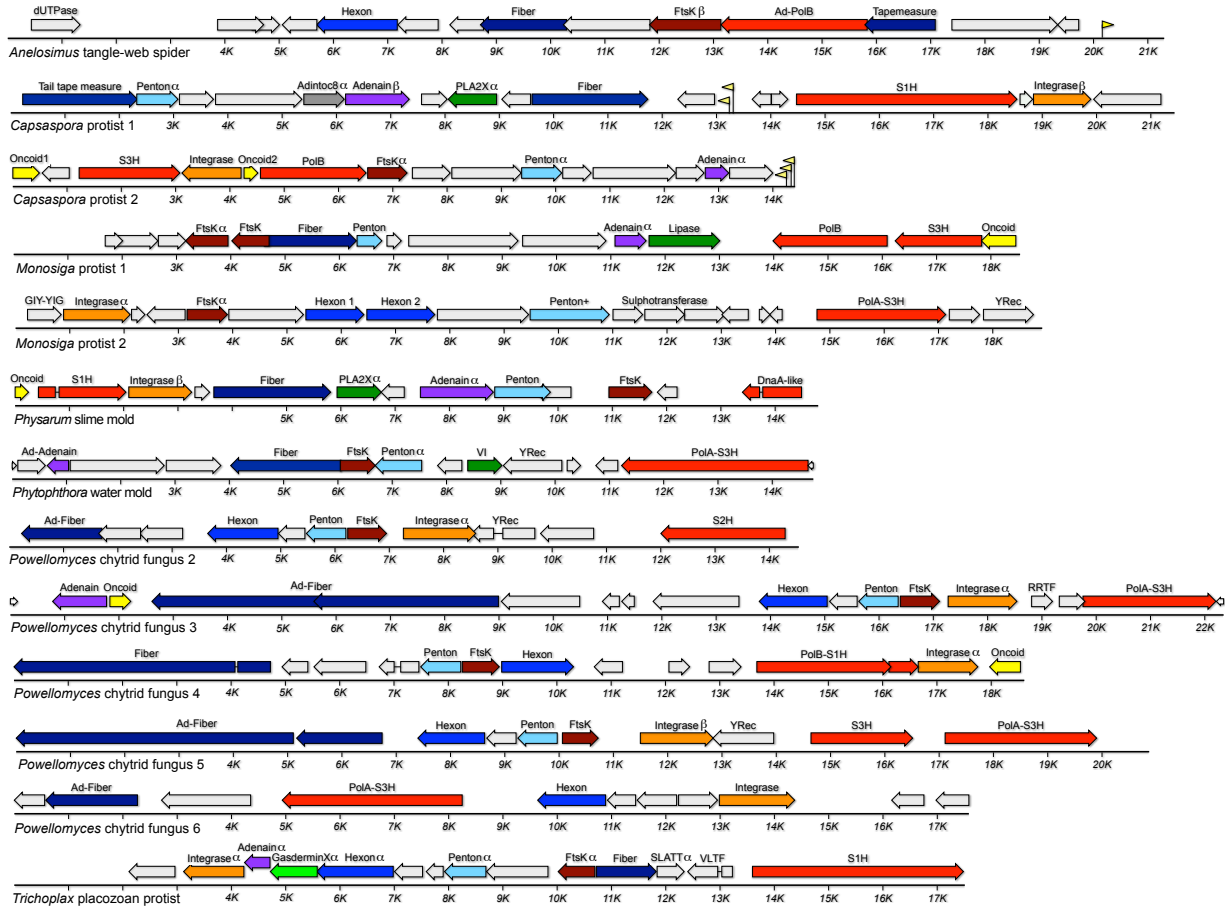

324  
325  
326  
327  
328  
329  
330  
331  
332  
333  
334  
335  
336  
337  
338  
339  
340  
341  
342  
343  
344

Figure 6: MELD viruses with other replicases. Greek letters indicate genes with sequences similar to Alpha or Beta adintoviruses in BLASTP searches. Sequences similar to adenoviruses are marked with “Ad-.” Yellow flags represent predicted tRNA genes. Abbreviations: dUTPase, similar to poxvirus deoxy-UTP diphosphatases; Fiber, similarity to bacteriophage tail fibers or other coiled-coil proteins; Tapemeasure, similarity to phage tail tape measure proteins; S1H, RecD/Pif1-like superfamily 1 helicase; YRec, homolog of phage tyrosine recombinases; TRAF, predicted structural similarity to TNF receptor associated factor 3; UCH, predicted structural similarity to ubiquitin C-terminal hydrolase cysteine proteases; IVA2, sequence similarity to adenovirus pIVa2 viral genome-packaging ATPases; DnaA-like, sequence distantly similar to DnaA and DnaB-like helicases; VI, similar to adenovirus virion core protein six; PolA, DNA polymerase family A (Pfam:00476); S3H superfamily 3 helicase similar to those observed in virophages and megaviruses; S2H, superfamily 2 helicase similar to DEAD-box helicase of Yellowstone Lake virophage 7 (YP\_009177696); TRAF UCH TBP Fbox, homologs of host proteins with these gene symbols; SLATT, homolog of host SMODS and SLOG-associating 2TM effector domain proteins; VLTf, homolog of mimivirus VLTf3-like transcription factor. See main text for information about other gene names.

345 In WGS searches for sequences resembling human adenovirus type 5 PolB, we did not detect any  
 346 contigs resembling full-length viruses in non-animal datasets. The searches did reveal the  
 347 complete ITR-bounded genome of a typical mastadenovirus in a dataset for *Dipodomys ordii* (a  
 348 type of kangaroo rat) as well as apparently complete MELD viruses in datasets for *Hydra*  
 349 *oligactis* (brown hydra) and *Anelosimus studiosus* (a type of tangle-web spider). Like known  
 350 adenoviruses, the *Hydra* and *Anelosimus* MELD viruses do not encode integrase genes and their  
 351 PolB genes do not encode detectable OTU domains.

352

### 353 PolB<sup>+</sup> parvoviruses

354

355 BLASTP searches using Alpha adintovirus PolB sequences return high-likelihood matches (E-  
 356 values <1e-80) for the PolB genes of an emerging group of bipartite parvoviruses referred to as  
 357 bidnaviruses (Krupovic and Koonin 2014)(Figure 1). Like adintoviruses, bidnavirus PolB genes  
 358 encode an N-terminal OTU domain. We searched assemblies of SRA datasets of interest for  
 359 additional examples of bidnavirus genomes. PolB<sup>+</sup> contigs were detected in datasets for the gut  
 360 contents of African termites (*Cubitermes ugandensis*), dog (*Canis lupus familiaris*) feces, the silk  
 361 glands of a false wolf spider (*Tengella perfuga*), and Tasmanian devil (*Sarcophilus harrisii*)  
 362 feces (Figure 7). The dog feces PolB sequence is 53% similar to the “structural protein” of Fresh  
 363 Meadows “densovirus” 3 previously detected in mouse (*Mus musculus*) feces  
 364 (AWB14611)(Williams, Che et al. 2018).  
 365

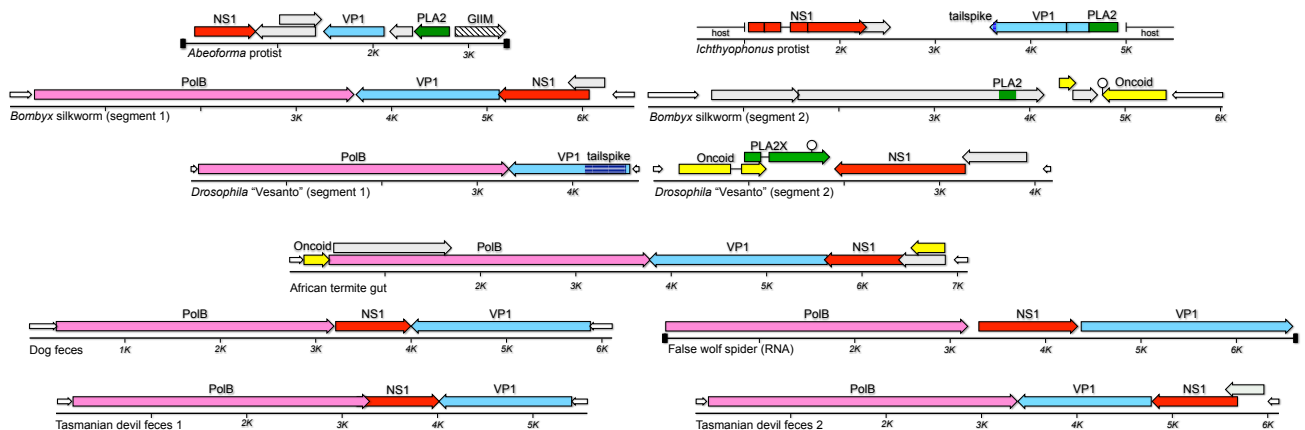

366

367 Figure 7: Bidnaviruses and non-animal parvovirus genome maps. Abbreviations: GIIM,  
 368 similarity to group II intron maturases; tailspike, similarity to bacteriophage short tail  
 369 fibers.

370

371 In previously reported bidnaviruses, the termini of each of the two genome segments have  
 372 matching nucleotide sequences. To search for second segments, we probed the assemblies for  
 373 examples of other contigs with termini similar to the ITRs of the initially observed bidnavirus  
 374 contigs. The datasets were also searched for contigs with sequences similar to previously  
 375 reported bidnavirus proteins. Second segments were not detected, suggesting that the five new  
 376 bidnaviruses may be monopartite. We suggest that the apparently monopartite viruses could still  
 377 be referred to as bidnaviruses (or, more specifically, bidnaviruses) but with the “bidna”  
 378 moniker connoting the presence of two types of DNA replicase genes, as opposed to the original  
 379 connotation of a virus with two genomic DNA segments.

380

381 Searches for examples of parvovirus NS1-like sequences did not reveal clear examples outside of  
382 multicellular animal datasets. A marginal exception was a group of sequences found in datasets  
383 for *Abeoforma whisleri* and *Ichthyophonus hoferi*, two unicellular eukaryotes that are thought to  
384 be closely related to multicellular animals. The observations suggest an early-animal origin for  
385 parvoviruses that involved acquisition of genes from Alpha adintoviruses.

386  
387

## 388 **Discussion**

389

390 We have identified a coherent family-like grouping of animal viruses that we call adintoviruses,  
391 connoting their hallmark adenovirus-like virion protein genes and retrovirus-like integrase genes.  
392 Adintovirus sequences are detectable either as apparently free linear DNA molecules or as  
393 endogenized integrants in WGS datasets representing all eumetazoan phyla. Although sequences  
394 resembling the PolB proteins of Alpha and Beta adintoviruses can also be found in datasets for  
395 non-animal eukaryotes, the sequences of adintovirus virion proteins appear to be restricted to  
396 animals.

397

398 We imagine that the related Alpha and Beta adintovirus-like lineages might have infected early  
399 eukaryotes and the two lineages gradually co-evolved with major divisions of eukaryotes,  
400 including multicellular animals. In this model, the sequences of the virion protein genes  
401 presumably evolved more rapidly than the conserved catalytic core of PolB, resulting in  
402 distinctive mutually unrecognizable virion protein sequences specific to each major division of  
403 eukaryotes. The model suggests that adenoviruses could be thought of as a related sister lineage  
404 that also arose in or before the first animals. Although adenoviruses are currently only known to  
405 infect vertebrates, the idea that the lineage long predates the emergence of vertebrates is  
406 consistent with our identification of a distantly adenovirus-like sequence in a spider dataset  
407 (Figure 6).

408

409 In non-animal eukaryote datasets, adintovirus-like PolB sequences can be found in a wide range  
410 of sequence contexts, ranging from elements with no obvious virion proteins to the genomes of  
411 megaviruses. Conversely, it appears that the adintovirus-like PolB can readily be replaced with  
412 other types of DNA replicase genes (Figure 6). This presumably reflects the previously proposed  
413 rampant horizontal gene transfer among virus lineages that infect unicellular eukaryotes.  
414 Although similar horizontal gene transfer events appear to have occurred between various  
415 animal-tropic virus families, including adintoviruses and parvoviruses (Figure 7), adomaviruses  
416 and polyomaviruses (Mizutani, Sayama et al. 2011, Dill, Camus et al. 2018)  
417 <https://www.biorxiv.org/content/10.1101/341131v2> and papillomaviruses and polyomaviruses  
418 (Woolford, Rector et al. 2007), each of these cases appears to represent single ancient event. It  
419 may be that the evolution of distinct tissues and organs or the development of cell-mediated  
420 immunity in multicellular animals placed limits on the likelihood that different virus lineages can  
421 co-infect a single cell and productively recombine. From this view, the distinctive gene  
422 combinations seen in adintoviruses and adenoviruses might simply be bottlenecked examples of  
423 the much larger range of gene combinations observed in MELD viruses of unicellular eukaryotes  
424 (Yutin, Kapitonov et al. 2015, Yutin, Shevchenko et al. 2015).

425

426 It has generally been assumed that the functionally similar oncogenes found in adenoviruses,  
427 papillomaviruses, parvoviruses, and polyomaviruses arose through convergent evolution or  
428 through horizontal gene transfer between virus families (de Souza, Iyer et al. 2010). Although  
429 small DNA tumor virus oncogenes show low overall sequence similarity, they can be roughly  
430 defined based on the presence of short linear motifs. Many adintoviruses encode candidate  
431 “Oncoid” proteins with these motifs. Bombyx silkworm bidnaparvovirus NS3, which we have  
432 designated as a candidate Oncoid (Figure 7) has previously been shown to be similar to a  
433 baculovirus protein of unknown function (Krupovic and Koonin 2014). We note that many of the  
434 proposed baculovirus homologs (e.g., YP\_009506034) share potential zinc-coordinating cysteine  
435 residues as well as a C-terminal LXCXE/CK2 site, qualifying the baculovirus proteins as  
436 candidate Oncoids as well. Surprisingly, candidate Oncoids were also observed in MELD viruses  
437 of unicellular eukaryotes (Figure 6). The predicted Oncoid2 gene of *Capsaspora* protist MELD  
438 virus 2 detects polyomavirus Large T oncogenes in DELTA-BLAST searches (E-value 4e-16). It  
439 is interesting to imagine that oncogenes in a broad range of animal DNA viruses might share an  
440 ancestry that pre-dates the emergence of multicellular animals.

441  
442 Adintoviruses encode a number of accessory genes that appear to be homologs of membrane-  
443 active proteins found in animal venom. These include bee and snake venom PLA2 and melittin,  
444 as well as a spider venom protein called cupiennin. Interestingly, venom PLA2 and melittin  
445 (which shows similarity to adenovirus pX in HHpred searches) act in concert (Vogt, Patzer et al.  
446 1970), suggesting the speculative hypothesis that these venom genes might have arisen from a  
447 captured viral PLA2X-like gene.

448  
449 In unpublished work, our group used a standard baculovirus-based expression system  
450 (ThermoFisher) to generate a virus-like particle (VLP) vaccine against BK polyomavirus  
451 (BKV)(Peretti, Geoghegan et al. 2018). The project provided an inadvertent natural experiment.  
452 Recombinant baculoviruses were generated in Sf9 cells and bulk protein expression was  
453 performed using the *Trichoplusia ni* cell line High Five. BKV VLPs were purified according to  
454 previously reported methods (Cardone, Moyer et al. 2014) involving ultracentrifugation through  
455 density gradients, nuclease digestion, and size exclusion chromatography. Deep sequencing of  
456 DNA extracted from the purified VLP preparation shows high-depth coverage of *Spodoptera*  
457 adintovirus genomes alongside incomplete patchy coverage of endogenized *Trichoplusia*-  
458 specific homologs of the two *Spodoptera* viruses (Supplemental File 1). It appears that Sf9-  
459 derived adintoviruses infected the High Five cells and this led to the production of adintovirus  
460 virions that co-purified with the recombinant BKV VLPs. The results suggest that standard insect  
461 cell cultures could serve as a laboratory model for productive adintovirus infection.

462  
463 A Beta adintovirus was detected in transcriptomic and WGS datasets for Mexican blind tetra  
464 cavefish (*Astyanax mexicanus*). Adintovirus transcripts were most abundant in head, kidney, and  
465 intestine samples and least abundant in muscle and whole embryo samples (Supplemental Table  
466 1). Analysis of the WGS dataset showed that adintovirus DNA reads outnumbered reads for a  
467 single copy host gene (gamma tubulin, NW\_019172896) by a factor of 25. At both an RNA and  
468 DNA level the *Astyanax* sequence showed a high degree of uniformity, suggesting a clonal  
469 infection. In contrast, pet store samples of a different species of tetra, *Gymnocorymbus ternetzi*  
470 (SRR2040422), showed such a complex range of adintovirus sequence variants that assembly of

471 contigs representing complete viral genomes was challenging. These observations suggest that  
472 tetras might serve as a tractable laboratory model for adintovirus infection.

473  
474 Adintoviruses have a number of features that could make them useful as recombinant gene  
475 transfer vectors. Their genome size is substantially larger than commonly used retroviral and  
476 parvoviral vectors. In contrast to adenovirus- and baculovirus-based vector systems, adintovirus  
477 genomes are small enough to be manipulated entirely in the setting of standard plasmids. An  
478 intriguing feature of the adintovirus integrase gene is the presence of a predicted chromodomain  
479 that, in LTR retrotransposons, is believed to influence integration site specificity (Kordis 2005).  
480 This could theoretically offer an advantage over retroviral vectors, which show little integration  
481 site specificity. Another potential practical use for adintoviruses might be as biocontrol agents  
482 for pest organisms, such as *Mayetiola destructor* barley midges or chytrid fungi that parasitize  
483 amphibians.

484  
485 An important implication of this study is that there may be additional unappreciated families of  
486 animal viruses hiding in plain sight in sequence databases. Adintoviruses may have been  
487 relatively easy quarry because they are able to integrate into host genomes, such that they are  
488 detectable in WGS datasets of randomly sampled animals that did not happen to be suffering  
489 from an active infection. In contrast to the hundreds of adintovirus-like contigs detected in our  
490 initial WGS survey, focused searches for adenoviruses (which do not encode integrases) detected  
491 only a single complete adenovirus genome. For future discovery efforts, it will be important to  
492 develop higher throughput methods using sensitive structure-guided searches to identify  
493 divergent new examples of viral hallmark genes in sequence datasets representing many  
494 individuals, including subjects suffering from disease. The key goal will be to understand which  
495 combinations of genes tend to co-occupy single contigs. Recently reported bioinformatics  
496 pipelines, such as Cenote-Taker (Tisza, Pastrana et al. 2019) and Mash Screen (Ondov, Starrett  
497 et al. 2019), should be useful for these purposes. Deposition of annotated viral genome  
498 sequences into publicly searchable databases will be critical for further expanding our  
499 understanding of the eukaryotic virome.

500

## 501 **Materials and Methods**

### 502 **Detection and analysis of viral sequences**

503 Adomavirus LO8 (Adenain) sequences were initially used for TBLASTN searches of the NCBI  
504 TSA and WGS databases. The relationship between adomavirus and adintovirus virion proteins  
505 is the subject of a separate manuscript (BioRxiv 341131v2). The Adenain sequences of *Nephila*  
506 orb-weaver spider contig (GFKT014647032) or a *Parasteatoda* spider contig (AOMJ02256338)  
507 were arbitrarily chosen for further TBLASTN searches of eukaryotic datasets in TSA and WGS  
508 databases. Adenain-bearing contigs 4-50kb in length were further searched (using CLC  
509 Genomics Workbench) for BLASTP-detectable PolB homologs. Contigs were inspected for the  
510 presence of nearly overlapping arrays of large (>100 AA) open reading frames. Contigs with  
511 inverted repeats flanking the ORF cluster were favored, but this was not a strict sorting criterion.

512 Selected contigs of interest were initially annotated using DELTA-BLAST searches of GenBank  
513 nr or HHpred analyses of single or aligned protein sequences against PDB\_mmCIF70,  
514 COG\_KOG, Pfam-A, and NCBI\_CD databases (Altschul, Madden et al. 1997, Altschul,  
515 Wootton et al. 2005, Soding 2005, Hildebrand, Remmert et al. 2009, Gerlt, Bouvier et al. 2015,  
516 Meier and Soding 2015, Zimmermann, Stephens et al. 2017). Protein sequences were extracted  
517 from the contigs using getORF <http://bioinfo.nhri.org.tw/cgi-bin/emboss/getorf> (Rice, Longden  
518 et al. 2000). Extracted protein sequences were clustered using EFI-EST  
519 <https://efi.igb.illinois.edu/efi-est/> (Gerlt, Bouvier et al. 2015, Zallot, Oberg et al. 2018) and  
520 displayed using Cytoscape v3.7.1 (Shannon, Markiel et al. 2003). Multiple sequence alignments  
521 were constructed using MAFFT <https://toolkit.tuebingen.mpg.de/#/tools/mafft>. Contigs were  
522 annotated using Cenote-Taker (Tisza, Pastrana et al. 2019) with an iteratively refined library of  
523 conserved adintovirus protein sequences. Compiled protein sequences are provided as a zipped  
524 set of fasta-format text files in Figure 1 Figure supplement 2. Maps were drawn using MacVector  
525 17 software. Phylogenetic analyses were performed using MAFFT 7  
526 <https://mafft.cbrc.jp/alignment/server/> (Kuraku, Zmasek et al. 2013, Katoh, Rozewicki et al.  
527 2019) and displayed using FigTree 1.4.4 <http://tree.bio.ed.ac.uk/software/figtree/>.

528 Selected contigs for which SRA datasets were available were subjected to reference-guided re-  
529 assembly using Megahit 1.2.9 (Li, Liu et al. 2015, Li, Luo et al. 2016) and/or the map reads to  
530 reference function of CLC Genomics Workbench. Annotated maps were submitted to GenBank  
531 as third party annotation assemblies (TPA\_asm). Graphical examples of the annotation process  
532 are depicted in Figure 2 Figure supplement 2.  
533

#### 534 **Data Availability**

535 GenBank accession numbers for sequences deposited in association with this study are:  
536 BK010888 BK010889 BK010890 BK010893 BK010894 BK010998 BK010999 BK011000  
537 BK011001 BK011002 BK011003 BK011004 BK011005 BK011006 BK011007 BK011008  
538 BK011009 BK011010 BK011011 BK011022 BK011023 BK011024 BK011025 BK011026  
539 BK012042 BK012043 BK012044 BK012045 BK012046 BK012047 BK012048 BK012049  
540 BK012050 BK012051 BK012052 BK012053 BK012054 BK012055 BK012056 BK012057  
541 BK012058 BK012059 BK012060 BK012061 BK012062 BK012063 BK012064 BK012084  
542 BK012085 BK012086.

543

#### 544 **Acknowledgments**

545 The authors are indebted to Eugene Koonin and Natalya Yutin for their generous guidance and  
546 for the spirited discussions that inspired us to pursue this study. We thank Karl Munger and Jim  
547 Pipas for their extensive advice about oncogene sequence motifs and Chris Bellas for useful  
548 discussions and for critical evaluation of the manuscript. We are also grateful to Patrick  
549 McTamney for guiding the production of BK polyomavirus VLP stocks.

550

551



## 552 References

- 553 Altschul, S. F., T. L. Madden, A. A. Schaffer, J. Zhang, Z. Zhang, W. Miller and D. J. Lipman  
554 (1997). "Gapped BLAST and PSI-BLAST: a new generation of protein database search  
555 programs." *Nucleic Acids Res* **25**(17): 3389-3402.
- 556 Altschul, S. F., J. C. Wootton, E. M. Gertz, R. Agarwala, A. Morgulis, A. A. Schaffer and Y. K.  
557 Yu (2005). "Protein database searches using compositionally adjusted substitution matrices."  
558 *FEBS J* **272**(20): 5101-5109.
- 559 Boratyn, G. M., A. A. Schaffer, R. Agarwala, S. F. Altschul, D. J. Lipman and T. L. Madden  
560 (2012). "Domain enhanced lookup time accelerated BLAST." *Biol Direct* **7**: 12.
- 561 Buck, C. B., K. Van Doorslaer, A. Peretti, E. M. Geoghegan, M. J. Tisza, P. An, J. P. Katz, J. M.  
562 Pipas, A. A. McBride, A. C. Camus, A. J. McDermott, J. A. Dill, E. Delwart, T. F. Ng, K.  
563 Farkas, C. Austin, S. Kraberger, W. Davison, D. V. Pastrana and A. Varsani (2016). "The  
564 Ancient Evolutionary History of Polyomaviruses." *PLoS Pathog* **12**(4): e1005574.
- 565 Cardone, G., A. L. Moyer, N. Cheng, C. D. Thompson, I. Dvoretzky, D. R. Lowy, J. T. Schiller,  
566 A. C. Steven, C. B. Buck and B. L. Trus (2014). "Maturation of the human papillomavirus 16  
567 capsid." *MBio* **5**(4): e01104-01114.
- 568 de Souza, R. F., L. M. Iyer and L. Aravind (2010). "Diversity and evolution of chromatin  
569 proteins encoded by DNA viruses." *Biochim Biophys Acta* **1799**(3-4): 302-318.
- 570 Dill, J. A., A. C. Camus, J. H. Leary and T. F. F. Ng (2018). "Microscopic and Molecular  
571 Evidence of the First Elasmobranch Adomavirus, the Cause of Skin Disease in a Giant  
572 Guitarfish, *Rhynchobatus djiddensis*." *MBio* **9**(3).
- 573 Dubois, H., F. Sorgeloos, S. T. Sarvestani, L. Martens, Y. Saeys, J. M. Mackenzie, M. Lamkanfi,  
574 G. van Loo, I. Goodfellow and A. Wullaert (2019). "Nlrp3 inflammasome activation and  
575 Gasdermin D-driven pyroptosis are immunopathogenic upon gastrointestinal norovirus  
576 infection." *PLoS Pathog* **15**(4): e1007709.
- 577 Duponchel, S. and M. G. Fischer (2019). "Viva lavidaviruses! Five features of virophages that  
578 parasitize giant DNA viruses." *PLoS Pathog* **15**(3): e1007592.
- 579 Fischer, M. G. and T. Hackl (2016). "Host genome integration and giant virus-induced  
580 reactivation of the virophage mavirus." *Nature* **540**(7632): 288-291.
- 581 Fu, L., B. Niu, Z. Zhu, S. Wu and W. Li (2012). "CD-HIT: accelerated for clustering the next-  
582 generation sequencing data." *Bioinformatics* **28**(23): 3150-3152.
- 583 Geisler, C. (2018). "A new approach for detecting adventitious viruses shows Sf-rhabdovirus-  
584 negative Sf-RVN cells are suitable for safe biologicals production." *BMC Biotechnol* **18**(1): 8.
- 585 Gerlt, J. A., J. T. Bouvier, D. B. Davidson, H. J. Imker, B. Sadkhin, D. R. Slater and K. L.  
586 Whalen (2015). "Enzyme Function Initiative-Enzyme Similarity Tool (EFI-EST): A web tool for  
587 generating protein sequence similarity networks." *Biochim Biophys Acta* **1854**(8): 1019-1037.
- 588 Gouw, M., S. Michael, H. Samano-Sanchez, M. Kumar, A. Zeke, B. Lang, B. Bely, L. B.  
589 Chemes, N. E. Davey, Z. Deng, F. Diella, C. M. Gurth, A. K. Huber, S. Kleinsorg, L. S.  
590 Schlegel, N. Palopoli, K. V. Roey, B. Altenberg, A. Remenyi, H. Dinkel and T. J. Gibson (2018).  
591 "The eukaryotic linear motif resource - 2018 update." *Nucleic Acids Res* **46**(D1): D428-D434.
- 592 Hildebrand, A., M. Remmert, A. Biegert and J. Soding (2009). "Fast and accurate automatic  
593 structure prediction with HHpred." *Proteins* **77 Suppl 9**: 128-132.
- 594 Huang, Y., B. Niu, Y. Gao, L. Fu and W. Li (2010). "CD-HIT Suite: a web server for clustering  
595 and comparing biological sequences." *Bioinformatics* **26**(5): 680-682.

596 Iyer, L. M., K. S. Makarova, E. V. Koonin and L. Aravind (2004). "Comparative genomics of the  
597 FtsK-HerA superfamily of pumping ATPases: implications for the origins of chromosome  
598 segregation, cell division and viral capsid packaging." *Nucleic Acids Res* **32**(17): 5260-5279.  
599 Katoh, K., J. Rozewicki and K. D. Yamada (2019). "MAFFT online service: multiple sequence  
600 alignment, interactive sequence choice and visualization." *Brief Bioinform* **20**(4): 1160-1166.  
601 Koonin, E. V., V. V. Dolja and M. Krupovic (2015). "Origins and evolution of viruses of  
602 eukaryotes: The ultimate modularity." *Virology* **479-480**: 2-25.  
603 Koonin, E. V., M. Krupovic and N. Yutin (2015). "Evolution of double-stranded DNA viruses of  
604 eukaryotes: from bacteriophages to transposons to giant viruses." *Ann N Y Acad Sci* **1341**: 10-  
605 24.  
606 Kordis, D. (2005). "A genomic perspective on the chromodomain-containing retrotransposons:  
607 Chromoviruses." *Gene* **347**(2): 161-173.  
608 Krupovic, M., D. H. Bamford and E. V. Koonin (2014). "Conservation of major and minor jelly-  
609 roll capsid proteins in Polinton (Maverick) transposons suggests that they are bona fide viruses."  
610 *Biol Direct* **9**: 6.  
611 Krupovic, M. and E. V. Koonin (2014). "Evolution of eukaryotic single-stranded DNA viruses of  
612 the Bidnaviridae family from genes of four other groups of widely different viruses." *Sci Rep* **4**:  
613 5347.  
614 Krupovic, M. and E. V. Koonin (2015). "Polintons: a hotbed of eukaryotic virus, transposon and  
615 plasmid evolution." *Nat Rev Microbiol* **13**(2): 105-115.  
616 Kuraku, S., C. M. Zmasek, O. Nishimura and K. Katoh (2013). "aLeaves facilitates on-demand  
617 exploration of metazoan gene family trees on MAFFT sequence alignment server with enhanced  
618 interactivity." *Nucleic Acids Res* **41**(Web Server issue): W22-28.  
619 Li, D., C. M. Liu, R. Luo, K. Sadakane and T. W. Lam (2015). "MEGAHIT: an ultra-fast single-  
620 node solution for large and complex metagenomics assembly via succinct de Bruijn graph."  
621 *Bioinformatics* **31**(10): 1674-1676.  
622 Li, D., R. Luo, C. M. Liu, C. M. Leung, H. F. Ting, K. Sadakane, H. Yamashita and T. W. Lam  
623 (2016). "MEGAHIT v1.0: A fast and scalable metagenome assembler driven by advanced  
624 methodologies and community practices." *Methods* **102**: 3-11.  
625 Li, W. and A. Godzik (2006). "Cd-hit: a fast program for clustering and comparing large sets of  
626 protein or nucleotide sequences." *Bioinformatics* **22**(13): 1658-1659.  
627 Meier, A. and J. Soding (2015). "Automatic Prediction of Protein 3D Structures by Probabilistic  
628 Multi-template Homology Modeling." *PLoS Comput Biol* **11**(10): e1004343.  
629 Mizutani, T., Y. Sayama, A. Nakanishi, H. Ochiai, K. Sakai, K. Wakabayashi, N. Tanaka, E.  
630 Miura, M. Oba, I. Kurane, M. Saijo, S. Morikawa and S. Ono (2011). "Novel DNA virus isolated  
631 from samples showing endothelial cell necrosis in the Japanese eel, *Anguilla japonica*." *Virology*  
632 **412**(1): 179-187.  
633 Moriyama, T., K. Terasawa, M. Fujiwara and N. Sato (2008). "Purification and characterization  
634 of organellar DNA polymerases in the red alga *Cyanidioschyzon merolae*." *FEBS J* **275**(11):  
635 2899-2918.  
636 Ondov, B. D., G. J. Starrett, A. Sappington, A. Kostic, S. Koren, C. B. Buck and A. M. Phillippy  
637 (2019). "Mash Screen: High-throughput sequence containment estimation for genome  
638 discovery." *bioRxiv*: 557314.  
639 Peretti, A., E. M. Geoghegan, D. V. Pastrana, S. Smola, P. Feld, M. Sauter, S. Lohse, M.  
640 Ramesh, E. S. Lim, D. Wang, C. Borgogna, P. C. FitzGerald, V. Bliskovsky, G. J. Starrett, E. K.  
641 Law, R. S. Harris, J. K. Killian, J. Zhu, M. Pineda, P. S. Meltzer, R. Boldorini, M. Gariglio and

- 642 C. B. Buck (2018). "Characterization of BK Polyomaviruses from Kidney Transplant Recipients  
643 Suggests a Role for APOBEC3 in Driving In-Host Virus Evolution." *Cell Host Microbe* **23**(5):  
644 628-635 e627.
- 645 Pipas, J. M. (1992). "Common and unique features of T antigens encoded by the polyomavirus  
646 group." *J Virol* **66**(7): 3979-3985.
- 647 Pipas, J. M. (2019). "DNA Tumor Viruses and Their Contributions to Molecular Biology." *J*  
648 *Virol* **93**(9).
- 649 Rice, P., I. Longden and A. Bleasby (2000). "EMBOSS: the European Molecular Biology Open  
650 Software Suite." *Trends Genet* **16**(6): 276-277.
- 651 Santiago-Rodriguez, T. M., M. Ly, M. C. Daigneault, I. H. Brown, J. A. McDonald, N. Bonilla,  
652 E. A. Vercoe and D. T. Pride (2015). "Chemostat culture systems support diverse bacteriophage  
653 communities from human feces." *Microbiome* **3**: 58.
- 654 Shannon, P., A. Markiel, O. Ozier, N. S. Baliga, J. T. Wang, D. Ramage, N. Amin, B.  
655 Schwikowski and T. Ideker (2003). "Cytoscape: a software environment for integrated models of  
656 biomolecular interaction networks." *Genome Res* **13**(11): 2498-2504.
- 657 Soding, J. (2005). "Protein homology detection by HMM-HMM comparison." *Bioinformatics*  
658 **21**(7): 951-960.
- 659 Tisza, M. J., D. V. Pastrana, N. L. Welch, B. Stewart, A. Peretti, G. J. Starrett, Y.-Y. S. Pang, A.  
660 Varsani, S. R. Krishnamurthy, P. A. Pesavento, D. H. McDermott, P. M. Murphy, J. L. Whited,  
661 B. Miller, J. M. Brenchley, S. P. Rosshart, B. Reherrmann, J. Doorbar, B. A. Ta'ala, O.  
662 Pletnikova, J. Troncoso, S. M. Resnick, A. M. Segall and C. B. Buck (2019). "Discovery of  
663 several thousand highly diverse circular DNA viruses." 555375.
- 664 Vogt, W., P. Patzer, L. Lege, H. D. Oldigs and G. Wille (1970). "Synergism between  
665 phospholipase A and various peptides and SH-reagents in causing haemolysis." *Naunyn*  
666 *Schmiedebergs Arch Pharmakol* **265**(5): 442-454.
- 667 Williams, S. H., X. Che, J. A. Garcia, J. D. Klena, B. Lee, D. Muller, W. Ulrich, R. M. Corrigan,  
668 S. Nichol, K. Jain and W. I. Lipkin (2018). "Viral Diversity of House Mice in New York City."  
669 *MBio* **9**(2).
- 670 Woolford, L., A. Rector, M. Van Ranst, A. Ducki, M. D. Bennett, P. K. Nicholls, K. S. Warren,  
671 R. A. Swan, G. E. Wilcox and A. J. O'Hara (2007). "A novel virus detected in papillomas and  
672 carcinomas of the endangered western barred bandicoot (*Perameles bougainville*) exhibits  
673 genomic features of both the Papillomaviridae and Polyomaviridae." *J Virol* **81**(24): 13280-  
674 13290.
- 675 Yutin, N., V. V. Kapitonov and E. V. Koonin (2015). "A new family of hybrid virophages from  
676 an animal gut metagenome." *Biol Direct* **10**: 19.
- 677 Yutin, N., D. Raoult and E. V. Koonin (2013). "Virophages, polintons, and transpovirons: a  
678 complex evolutionary network of diverse selfish genetic elements with different reproduction  
679 strategies." *Virol J* **10**: 158.
- 680 Yutin, N., S. Shevchenko, V. Kapitonov, M. Krupovic and E. V. Koonin (2015). "A novel group  
681 of diverse Polinton-like viruses discovered by metagenome analysis." *BMC Biol* **13**: 95.
- 682 Zallot, R., N. O. Oberg and J. A. Gerlt (2018). "'Democratized' genomic enzymology web tools  
683 for functional assignment." *Curr Opin Chem Biol* **47**: 77-85.
- 684 Zimmermann, L., A. Stephens, S. Z. Nam, D. Rau, J. Kübler, M. Lozajic, F. Gabler, J. Söding,  
685 A. N. Lupas and V. Alva (2017). "A Completely Reimplemented MPI Bioinformatics Toolkit  
686 with a New HHpred Server at its Core." *J Mol Biol* **S0022-2836**(17): 30587-30589.

687
